# Supplementary material for: Improvement strategies for heuristic algorithms based on machine learning and information concepts: a review of the seahorse optimization algorithm
Source: PeerJ Comput Sci. 2025 Apr 1;11:e2805. doi: 10.7717/peerj-cs.2805 (PMC12190738; doi:10.7717/peerj-cs.2805)
Supplement: Supplemental Information 1 [file peerj-cs-11-2805-s001.xlsx]

## Sheet: Sheet1
Function	Metric	ISHO	SHO	SOA	WOA	PIO	SO	DBO	NOA	GWO
F1	Mean	0.00E+00	5.41E-305	1.70E-33	6.21E-190	6.45E-216	2.37E-195	8.36E-268	5.10E+04	4.10E-85
F1	Std	0.00E+00	0.00E+00	3.62E-33	0.00E+00	0.00E+00	0.00E+00	0.00E+00	6.78E+03	6.28E-85
F1	Best	0.00E+00	5.04E-313	1.68E-35	1.78E-205	2.43E-231	2.01E-200	0.00E+00	3.17E+04	2.49E-87
F1	Worst	0.00E+00	1.08E-303	1.64E-32	1.24E-188	6.41E-215	2.09E-194	1.67E-266	5.95E+04	2.21E-84
F2	Mean	2.52E-292	5.96E-169	1.15E-20	6.96E-114	7.53E-107	7.17E-100	2.07E-140	7.57E+09	3.83E-49
F2	Std	0.00E+00	0.00E+00	1.55E-20	2.36E-113	2.76E-106	1.02E-99	8.98E-140	3.09E+10	3.45E-49
F2	Best	3.98E-301	4.32E-174	8.47E-22	3.25E-123	3.64E-117	8.34E-102	4.94E-181	1.37E+06	5.53E-50
F2	Worst	3.02E-291	4.63E-168	5.86E-20	1.04E-112	1.22E-105	3.59E-99	4.02E-139	1.39E+11	1.35E-48
F3	Mean	0.00E+00	5.55E-218	2.22E-19	4.73E+03	3.62E-214	2.99E-130	1.80E-93	7.30E+04	4.96E-27
F3	Std	0.00E+00	0.00E+00	3.67E-19	4.04E+03	0.00E+00	1.33E-129	8.06E-93	1.32E+04	9.40E-27
F3	Best	0.00E+00	2.07E-228	1.46E-23	9.43E+01	2.53E-221	1.22E-144	0.00E+00	4.38E+04	6.58E-31
F3	Worst	0.00E+00	9.93E-217	1.54E-18	1.27E+04	6.62E-213	5.97E-129	3.60E-92	1.05E+05	3.82E-26
F4	Mean	2.67E-274	2.37E-119	1.60E-10	2.19E+01	1.05E-107	6.31E-89	3.60E-96	8.00E+01	1.86E-21
F4	Std	0.00E+00	8.42E-119	4.12E-10	2.11E+01	3.93E-107	2.22E-88	1.61E-95	3.09E+00	3.82E-21
F4	Best	9.89E-288	4.12E-124	5.66E-13	5.50E-07	8.28E-113	1.13E-91	2.96E-178	7.05E+01	1.86E-23
F4	Worst	5.31E-273	3.78E-118	1.74E-09	5.48E+01	1.76E-106	1.00E-87	7.20E-95	8.33E+01	1.51E-20
F5	Mean	2.09E+01	2.74E+01	2.76E+01	2.59E+01	2.89E+01	4.36E+01	2.32E+01	1.54E+08	2.65E+01
F5	Std	1.12E+01	6.57E-01	5.40E-01	1.98E-01	7.73E-02	4.60E+01	2.72E-01	2.91E+07	7.19E-01
F5	Best	9.84E-02	2.63E+01	2.71E+01	2.57E+01	2.88E+01	2.87E+01	2.27E+01	9.47E+07	2.52E+01
F5	Worst	2.80E+01	2.88E+01	2.88E+01	2.65E+01	2.90E+01	2.00E+02	2.38E+01	1.88E+08	2.87E+01
F6	Mean	6.31E-02	2.20E+00	2.40E+00	3.40E-04	3.81E+00	1.26E+00	3.73E-25	5.04E+04	1.38E-01
F6	Std	1.79E-01	4.41E-01	5.81E-01	1.42E-04	1.87E+00	9.18E-01	4.73E-25	4.80E+03	1.91E-01
F6	Best	2.37E-04	1.53E+00	1.25E+00	1.36E-04	9.47E-01	7.24E-02	1.18E-26	3.99E+04	4.59E-06
F6	Worst	7.50E-01	3.25E+00	3.49E+00	6.78E-04	6.98E+00	3.57E+00	1.92E-24	5.95E+04	7.53E-01
F7	Mean	1.50E-05	1.60E-05	2.84E-04	5.91E-04	5.39E-05	3.47E-05	1.16E-03	7.04E+01	2.85E-04
F7	Std	1.34E-05	1.66E-05	1.86E-04	6.44E-04	4.77E-05	2.86E-05	8.33E-04	1.02E+01	1.63E-04
F7	Best	2.01E-06	7.34E-07	6.03E-05	1.33E-05	4.92E-06	3.05E-06	1.66E-04	4.98E+01	7.84E-05
F7	Worst	6.17E-05	7.76E-05	7.43E-04	1.86E-03	1.68E-04	1.18E-04	3.51E-03	8.73E+01	6.86E-04
F8	Mean	-4.18E+04	-1.39E+04	-1.31E+04	-4.08E+04	-1.29E+04	-1.82E+04	-3.06E+04	-1.81E+04	-1.75E+04
F8	Std	1.31E+02	4.97E+02	2.31E+03	1.32E+03	1.08E+03	7.46E-12	6.19E+03	7.46E-12	1.85E+03
F8	Best	-4.19E+04	-1.51E+04	-1.70E+04	-4.19E+04	-1.52E+04	-1.81E+04	-4.16E+04	-1.81E+04	-2.21E+04
F8	Worst	-4.14E+04	-1.32E+04	-1.02E+04	-3.72E+04	-1.12E+04	-1.81E+04	-2.29E+04	-1.81E+04	-1.40E+04
F9	Mean	0.00E+00	0.00E+00	0.00E+00	2.84E-15	0.00E+00	4.68E+01	3.00E+01	3.77E+02	9.07E-01
F9	Std	0.00E+00	0.00E+00	0.00E+00	1.27E-14	0.00E+00	1.22E+01	5.47E+01	1.85E+01	2.88E+00
F9	Best	0.00E+00	0.00E+00	0.00E+00	0.00E+00	0.00E+00	2.80E+01	0.00E+00	3.33E+02	0.00E+00
F9	Worst	0.00E+00	0.00E+00	0.00E+00	5.68E-14	0.00E+00	6.67E+01	1.56E+02	4.03E+02	1.12E+01
F10	Mean	4.44E-16	3.82E-15	1.90E+01	3.11E-15	4.44E-16	2.00E+01	4.44E-16	2.00E+01	9.86E-15
F10	Std	0.00E+00	7.94E-16	4.46E+00	2.79E-15	0.00E+00	2.03E-03	0.00E+00	7.29E-15	2.89E-15
F10	Best	4.44E-16	4.44E-16	2.18E-14	4.44E-16	4.44E-16	2.00E+01	4.44E-16	2.00E+01	7.55E-15
F10	Worst	4.44E-16	4.00E-15	2.00E+01	7.55E-15	4.44E-16	2.00E+01	4.44E-16	2.00E+01	1.47E-14
F11	Mean	0.00E+00	0.00E+00	1.15E-03	0.00E+00	0.00E+00	9.96E-02	0.00E+00	4.69E+02	5.12E-04
F11	Std	0.00E+00	0.00E+00	5.14E-03	0.00E+00	0.00E+00	1.69E-01	0.00E+00	3.05E+01	2.29E-03
F11	Best	0.00E+00	0.00E+00	0.00E+00	0.00E+00	0.00E+00	0.00E+00	0.00E+00	4.05E+02	0.00E+00
F11	Worst	0.00E+00	0.00E+00	2.30E-02	0.00E+00	0.00E+00	4.45E-01	0.00E+00	5.25E+02	1.02E-02
F12	Mean	3.61E-04	1.20E-01	1.92E-01	5.56E-05	8.52E-01	1.81E+00	2.94E-13	2.83E+08	1.40E-02
F12	Std	1.46E-03	4.15E-02	6.38E-02	3.49E-05	4.11E-01	2.01E+00	1.31E-12	5.80E+07	1.17E-02
F12	Best	8.49E-07	4.82E-02	1.07E-01	1.45E-05	1.42E-01	3.51E-01	4.18E-29	1.78E+08	2.92E-07
F12	Worst	6.56E-03	2.03E-01	3.38E-01	1.53E-04	1.39E+00	6.69E+00	5.88E-12	4.03E+08	3.31E-02
F13	Mean	5.55E-04	1.43E+00	1.67E+00	5.80E-03	1.26E+00	2.60E+00	5.90E-02	6.12E+08	1.29E-01
F13	Std	2.93E-04	3.12E-01	1.41E-01	1.09E-02	5.72E-01	5.67E-01	6.68E-02	1.15E+08	9.78E-02
F13	Best	1.51E-04	1.02E+00	1.24E+00	4.72E-04	7.00E-01	1.41E+00	3.91E-26	3.76E+08	6.07E-06
F13	Worst	1.03E-03	2.20E+00	1.86E+00	4.69E-02	2.67E+00	3.00E+00	2.07E-01	8.06E+08	3.00E-01
F14	Mean	9.98E-01	2.57E+00	9.98E-01	9.98E-01	9.98E-01	9.98E-01	9.98E-01	4.83E+00	2.67E+00
F14	Std	3.78E-16	2.95E+00	1.69E-09	8.48E-13	9.23E-08	0.00E+00	0.00E+00	2.24E+00	2.92E+00
F14	Best	9.98E-01	9.98E-01	9.98E-01	9.98E-01	9.98E-01	9.98E-01	9.98E-01	1.07E+00	9.98E-01
F14	Worst	9.98E-01	1.08E+01	9.98E-01	9.98E-01	9.98E-01	9.98E-01	9.98E-01	9.59E+00	1.08E+01
F15	Mean	3.08E-04	4.27E-04	1.23E-03	6.62E-04	5.44E-04	1.88E-03	5.24E-04	1.36E-02	3.99E-04
F15	Std	8.38E-08	3.63E-04	1.11E-05	4.04E-04	1.35E-04	4.37E-03	2.76E-04	9.24E-03	2.82E-04
F15	Best	3.07E-04	3.08E-04	1.22E-03	3.08E-04	3.77E-04	3.08E-04	3.07E-04	2.13E-03	3.07E-04
F15	Worst	3.08E-04	1.70E-03	1.27E-03	1.24E-03	8.75E-04	2.04E-02	1.22E-03	4.54E-02	1.22E-03
F20	Mean	-2.74E+00	-3.13E+00	-3.04E+00	-3.25E+00	-3.14E+00	-3.32E+00	-3.25E+00	-2.62E+00	-3.26E+00
F20	Std	3.10E-01	1.26E-01	5.07E-02	6.18E-02	4.68E-02	2.66E-02	6.45E-02	2.04E-01	6.69E-02
F20	Best	-3.16E+00	-3.32E+00	-3.13E+00	-3.32E+00	-3.25E+00	-3.32E+00	-3.32E+00	-3.00E+00	-3.32E+00
F20	Worst	-2.01E+00	-2.84E+00	-3.02E+00	-3.19E+00	-3.05E+00	-3.20E+00	-3.14E+00	-2.28E+00	-3.14E+00
F21	Mean	-1.00E+01	-6.62E+00	-4.83E+00	-1.02E+01	-6.24E+00	-8.66E+00	-7.00E+00	-1.46E+00	-9.14E+00
F21	Std	1.88E-01	2.79E+00	4.02E+00	2.62E-04	1.71E+00	2.70E+00	2.70E+00	5.41E-01	2.08E+00
F21	Best	-1.02E+01	-1.01E+01	-1.01E+01	-1.02E+01	-9.49E+00	-1.02E+01	-1.02E+01	-2.81E+00	-1.02E+01
F21	Worst	-9.46E+00	-8.82E-01	-4.97E-01	-1.02E+01	-4.71E+00	-2.63E+00	-2.63E+00	-7.76E-01	-5.06E+00
F22	Mean	-1.02E+01	-6.80E+00	-7.69E+00	-1.01E+01	-5.38E+00	-9.44E+00	-6.16E+00	-1.81E+00	-1.01E+01
F22	Std	1.78E-01	2.73E+00	3.96E+00	1.19E+00	1.18E+00	2.26E+00	2.54E+00	6.18E-01	1.19E+00
F22	Best	-1.04E+01	-1.04E+01	-1.04E+01	-1.04E+01	-8.51E+00	-1.04E+01	-1.04E+01	-3.39E+00	-1.04E+01
F22	Worst	-9.87E+00	-3.72E+00	-9.08E-01	-5.09E+00	-4.72E+00	-2.77E+00	-2.77E+00	-9.06E-01	-5.09E+00
F23	Mean	-1.04E+01	-6.20E+00	-9.44E+00	-1.03E+01	-6.21E+00	-1.01E+01	-7.10E+00	-1.80E+00	-1.05E+01
F23	Std	1.12E-01	2.20E+00	2.21E+00	1.21E+00	1.68E+00	1.51E+00	2.75E+00	4.00E-01	1.60E-04
F23	Best	-1.05E+01	-1.05E+01	-1.05E+01	-1.05E+01	-1.01E+01	-1.05E+01	-1.05E+01	-2.64E+00	-1.05E+01
F23	Worst	-1.02E+01	-5.13E+00	-5.13E+00	-5.13E+00	-4.83E+00	-3.84E+00	-3.84E+00	-1.33E+00	-1.05E+01
